# Supplementary material for: High quality nano-patterned thin films of the coordination compound {Fe(pyrazine)[Pt(CN)4]} deposited layer-by-layer
Source: Royal Society of Chemistry journal article supplement (doi:10.1039/c1nj20212j), 2011-01-01

## **ELECTRONIC SUPPORTING INFORMATION**

### **High quality nano-patterned thin films of the coordination compound**

### **{Fe(pyrazine)[Pt(CN)<sub>4</sub>]} deposited layer-by-layer**

Carlos Bartual-Murgui<sup>1</sup>, Lionel Salmon<sup>1</sup>, Amal Akou<sup>1</sup>, Christophe Thibault<sup>2</sup>, Gábor Molnár<sup>1</sup>,  
Tarik Mahfoud<sup>1,3</sup>, Zouheir Sekkat<sup>3,4</sup>, José Antonio Real<sup>5</sup>, and Azzedine Bousseksou<sup>1</sup>

<sup>1</sup> *LCC ; CNRS & Université de Toulouse (UPS, INP) ; 205 route de Narbonne, F-31077 Toulouse, France*

<sup>2</sup> *LAAS ; CNRS & Université de Toulouse (UPS, INSA, ISAE) ; 7 avenue du Colonel Roche, F-31077 Toulouse, France*

<sup>3</sup> *Optics & Photonics Center (OPC), Moroccan Foundation for Science, Innovation and Research (MAScIR); Technopolis Rabatshore, Morocco*

<sup>4</sup> *Hassan II Academy of Science and Technology, Rabat, Morocco*

<sup>5</sup> *Instituto de Ciencia Molecular (ICMol), Universidad de Valencia, C/ Catedrático José Beltrán Martínez, Valencia, Spain*

**Figure S1.** 2D and 3D AFM images and height profile of a continuous {Fe(pyrazine)[Pt(CN)<sub>4</sub>]} layer following 4 deposition cycles carried out at **room temperature** (reagents concentration = 50 mM, dipping time = 1 min).

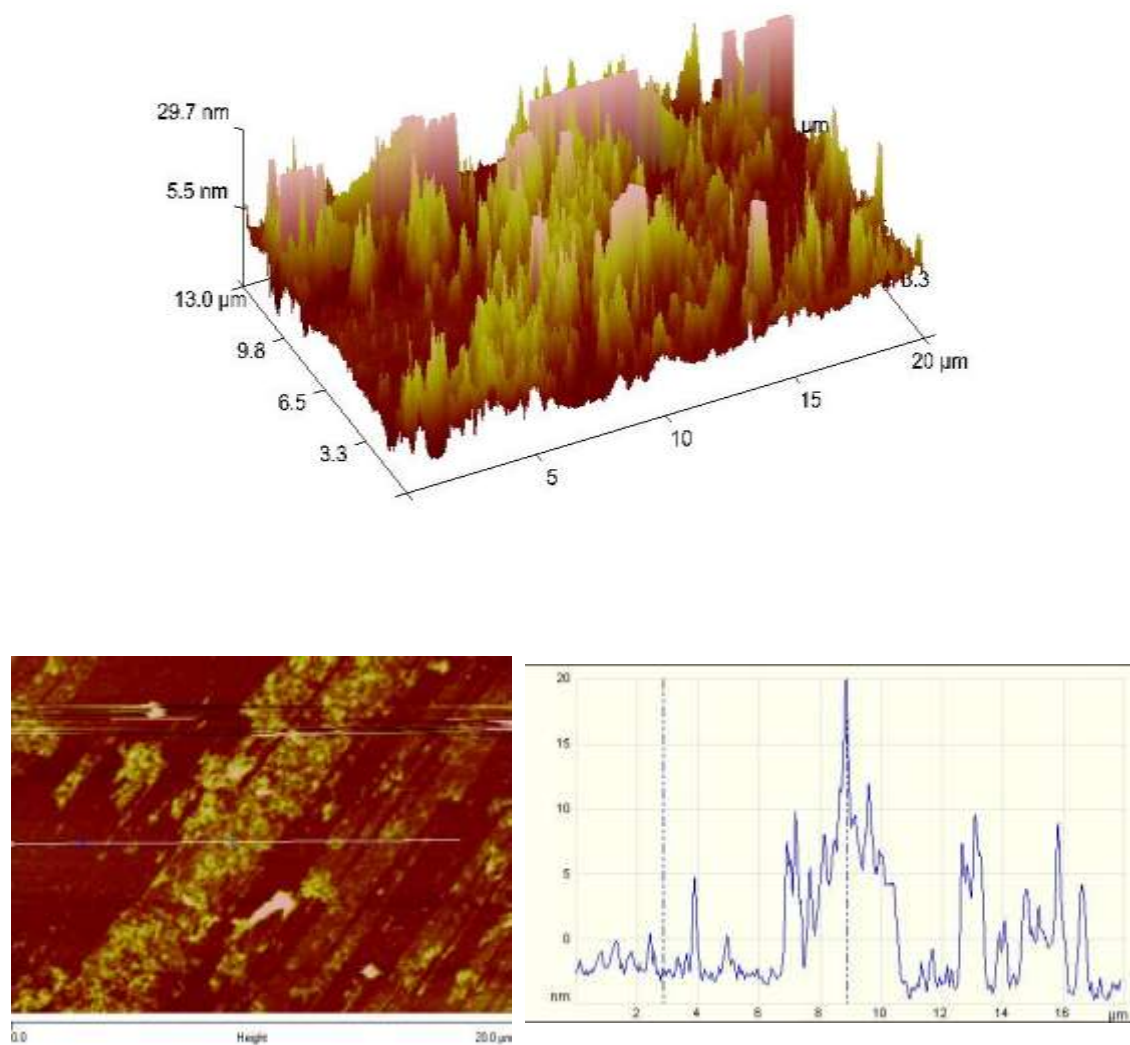

**Figure S2.** AFM image of a continuous  $\{\text{Fe}(\text{pyrazine})[\text{Pt}(\text{CN})_4]\}$  layer following 4 deposition cycles carried out at  $-78\text{ }^\circ\text{C}$  (reagents concentration = 50 mM, dipping time = 1 min).

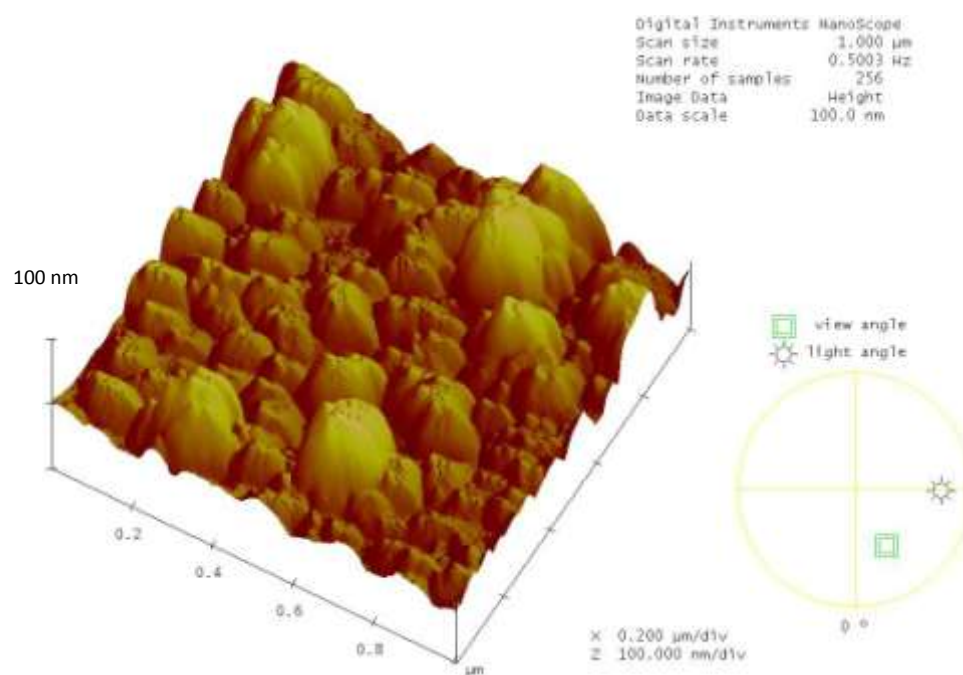

**Figure S3.** AFM images comparing the surface topography of two continuous {Fe(pyrazine)[Pt(CN)<sub>4</sub>]} films following 5 deposition cycles with either K<sub>2</sub>[PtCN<sub>4</sub>] (a) or (TBA)<sub>2</sub>[PtCN<sub>4</sub>] (TBA = tetrabutyl ammonium) (b) as a starting platinate salt (experiment realized at -78°C with reagents concentration = 5 mM, dipping time = 8 hours). The measured roughness on the whole image was 1.1 and 5 nm using the potassium and the tetrabutyl ammonium derivative, respectively.

a)

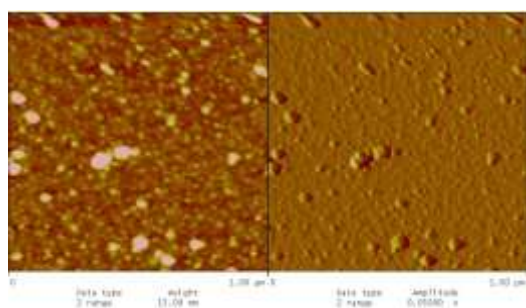

b)

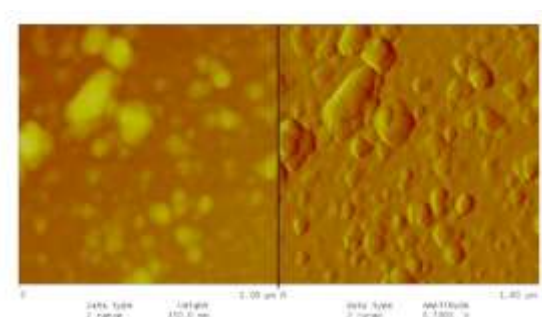

**Figure S4.** Selected typical AFM images ( $1 \times 1 \mu\text{m}^2$ ) of the optimized deposition of a thin film of the  $\{\text{Fe}(\text{pyrazine})[\text{Pt}(\text{CN})_4]\}$  complex on the disulfide-functionalised gold surface following a) 5, b) 10 and c) 15 deposition cycles.

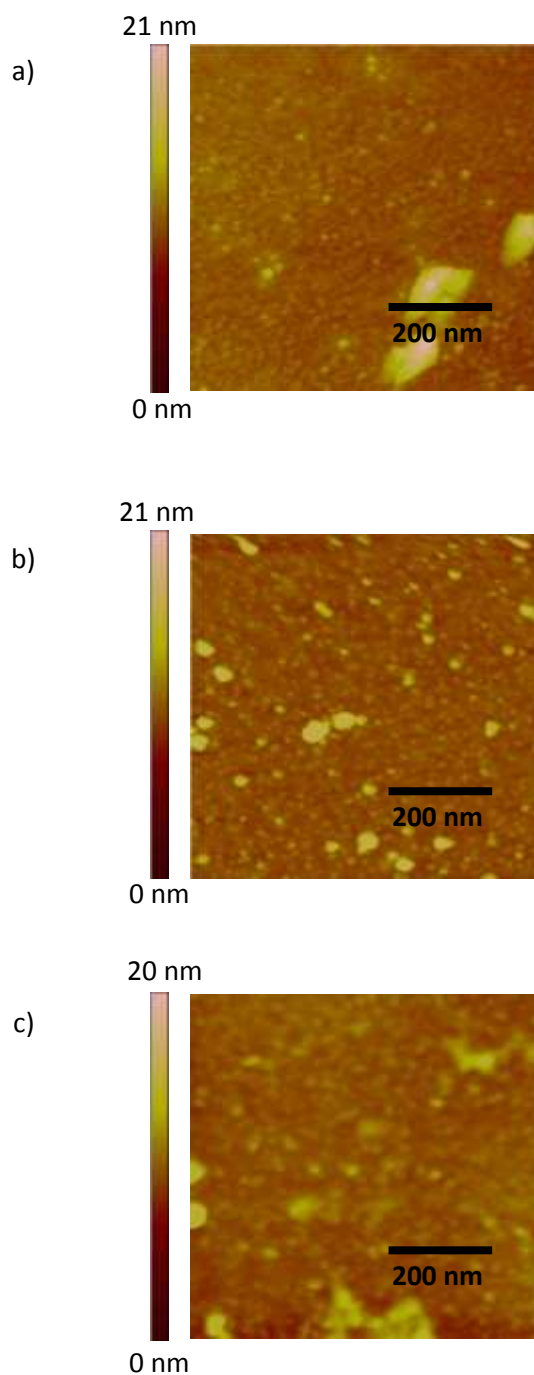

Supplement: c1nj20212j.pdf [file c1nj20212j.pdf]
